# Supplementary material for: Acute Hypoxia Profile is a Stronger Prognostic Factor than Chronic Hypoxia in Advanced Stage Head and Neck Cancer Patients
Source: MDPI journal article supplement (doi:10.3390/cancers11040583), 2019-04-25
Supplement: s1 [file s1]

**Supplementary Table S1.** Overview of the four clinical hypoxia gene expression profiles associated with patient outcome in HNSCC.

| Year | Authors                             | Genes | Method used to identify the relevant genes                                                                         |
|------|-------------------------------------|-------|--------------------------------------------------------------------------------------------------------------------|
| 2007 | Winter <i>et al</i> <sup>25</sup>   | 99    | Clustering of genes around 10 well-known hypoxia associated genes                                                  |
| 2010 | Buffa <i>et al</i> <sup>26</sup>    | 51    | Genes with similar expression pattern as well-known hypoxia associated genes in 3 HNSCC and 5 breast cancer series |
| 2011 | Toustrup <i>et al</i> <sup>13</sup> | 15    | In vitro experiments and correlation with Eppendorf hypoxia measurements                                           |
| 2013 | Eustace <i>et al</i> <sup>27</sup>  | 26    | Reduced variant of Buffa <i>et al.</i> , validated in ARCON series                                                 |

**Supplementary Table S2.** Genes in the used gene expression profiles

| Winter       | Buffa    | Toustrup | Eustace  | Seigneuric Acute | Seigneuric Chronic |
|--------------|----------|----------|----------|------------------|--------------------|
| ADORA2B      | ACOT7    | ADM      | ALDOA    | ACACA            | ADAMTS13           |
| AFARP1       | ADM      | ALDOA    | ANGPTL4  | ACOX1            | ANGPTL4            |
| AK3          | AK3L1    | ANKRD37  | ANLN     | ACSS1            | ARID5B             |
| ALDOA        | ALDOA    | BNIP3    | BNC1     | AIF1             | ARL6IP1            |
| ANGPTL4      | ANKRD37  | BNIP3L   | C20orf20 | AMH              | C8orf4             |
| ANKRD9       | ANLN     | C3orf28  | CA9      | ATF3             | CASC2              |
| ANLN         | BNIP3    | EGLN3    | CDKN3    | ATP5S            | CDKN2D             |
| AWR          | C20orf20 | KCTD11   | COL4A6   | ATXN7L1          | CEP250             |
| B4GALT2      | CA9      | LOX      | DCBLD1   | BACH1            | CNOT2              |
| BCAR1        | CDKN3    | NDRG1    | ENO1     | BET1L            | CRABP2             |
| BMS1L        | CHCHD2   | P4HA1    | FAM83B   | BTBD7            | CSRP2              |
| BNIP3        | CORO1C   | P4HA2    | FOSL1    | C12orf30         | DDIT4              |
| C14orf156    | CTSL2    | PDK1     | GNAI1    | C12orf53         | DGCR8              |
| C15orf25     | DDIT4    | PFKFB3   | HIG2     | CCL26            | DOCK1              |
| C20orf20     | ENO1     | SLC2A1   | KCTD11   | CCNH             | DPYSL2             |
| CA12         | ESRP1    |          | KRT17    | CCT2             | EHHADH             |
| CA9          | GAPDH    |          | LDHA     | CENTB2           | EIF4E3             |
| CDCA4P       | GPI      |          | MPRS17   | COL6A3           | ENO1               |
| COL4A5       | HIG2     |          | P4HA1    | CPEB4            | ENO2               |
| CORO1C       | HK2      |          | PGAM1    | DKFZP761H1       | FAM83A             |
| CTEN         | KIF20A   |          | PGK1     | DUSP3            | FANCC              |
| DKFZP564D166 | KIF4A    |          | SDC1     | EIF4EBP2         | FNDC3B             |
| DPM2         | LDHA     |          | SLC16A1  | FAM92A1          | GPR75              |
| EIF2S1       | LRRC42   |          | SLC2A1   | GAS6             | HIST1H4C           |
| GAPD         | MAD2L2   |          | TPI1     | GATAD2B          | HNRPAO             |
| GMFB         | MAP7D1   |          | VEGFA    | GFOD2            | INSIG1             |
| GSS          | MCTS1    |          |          | GRK6             | JUN                |
| HES2         | MIF      |          |          | GRM3             | KALRN              |
| HIG2         | MRPL13   |          |          | HIST1H2AL        | KEAP1              |
| HOMER1       | MRPL15   |          |          | HMMR             | KIF1B              |
| HSPC163      | MRPS17   |          |          | IFI6             | KIRREL             |
| IL8          | NDRG1    |          |          | IGF1R            | KRT8               |
| IMP-2        | NP       |          |          | IGFBP1           | LOC645619          |
| KCTD11       | P4HA1    |          |          | IGSF11           | LOX                |
| KIAA1393     | PFKP     |          |          | JMJD2A           | MKKNK2             |
| KRT17        | PGAM1    |          |          | KIAA1219         | MLL3               |
| LDHA         | PGK1     |          |          | LOC64645 0       | MXI1               |
| LDLR         | PSMA7    |          |          | LOC728488        | MYADM              |
| LOC149464    | PSRC1    |          |          | LY86             | NAV2               |
| LOC56901     | SEC61G   |          |          | MAML2            | NDRG1              |
| LRP2BP       | SHCBP1   |          |          | NCAPH2           | PCTK3              |
| MGC14560     | SLC16A1  |          |          | NIT1             | PDK1               |
| MGC17624     | SLC25A32 |          |          | NSD1             | PFKP               |
| MGC2408      | SLC2A1   |          |          | OSTM1            | PGK1               |
| MGC2654      | TPI1     |          |          | PAPPA            | PIM3               |
| MIF          | TUBA1B   |          |          | PARG             | PLOD1              |
| MNAT1        | TUBA1C   |          |          | PCF11            | PPP1R3B            |
| MRPL14       | TUBB6    |          |          | PCSK1            | PRKCB1             |

|         |        |  |  |         |          |
|---------|--------|--|--|---------|----------|
| MRPS17  | UTP11L |  |  | PEX14   | PRKCBP1  |
| MTX1    | VEGFA  |  |  | PHF10   | PTGES    |
| NDRG1   | YKT6   |  |  | PIK3R4  | RAVER2   |
| NME1    |        |  |  | PRKAG2  | SERINC5  |
| NTMT1   |        |  |  | PTPLAD1 | SLC6A10P |
| NUDT15  |        |  |  | RAB4B   | SLC6A8   |
| P4HA1   |        |  |  | RBM4    | SLCO4A1  |
| PDZK11  |        |  |  | RBPMS   | SMEK1    |
| PFKFB4  |        |  |  | RHOBTB3 | STRBP    |
| PGAM1   |        |  |  | RNASE4  | SYTL2    |
| PGF     |        |  |  | SLC5A12 | TCBA1    |
| PGK1    |        |  |  | SOX12   | NEAT1    |
| PLAU    |        |  |  | SSH2    | TSC22D2  |
| PLEKHG3 |        |  |  | ST3GAL1 | UHRF1    |
| PPARD   |        |  |  | TERT    | WSB1     |
| PPP2CZ  |        |  |  | TIMP2   | ZFHX1B   |
| PPP4R1  |        |  |  | TLE3    | ZNF511   |
| PSMA7   |        |  |  | TP53111 |          |
| PSMB7   |        |  |  | TRNT1   |          |
| PSMD2   |        |  |  | TTLL5   |          |
| PTGFRN  |        |  |  | ZNF117  |          |
| PVR     |        |  |  | ZNF664  |          |
| PYGL    |        |  |  |         |          |
| RAN     |        |  |  |         |          |
| RNF24   |        |  |  |         |          |
| RNPS1   |        |  |  |         |          |
| RUVBL2  |        |  |  |         |          |
| S100A10 |        |  |  |         |          |
| S100A3  |        |  |  |         |          |
| SIP1    |        |  |  |         |          |
| SLC16A1 |        |  |  |         |          |
| SLC2A1  |        |  |  |         |          |
| SLC6A10 |        |  |  |         |          |
| SLC6A8  |        |  |  |         |          |
| SLCO1B3 |        |  |  |         |          |
| SMILE   |        |  |  |         |          |
| SNX24   |        |  |  |         |          |
| SPTB    |        |  |  |         |          |
| TEAD4   |        |  |  |         |          |
| TFAP2C  |        |  |  |         |          |
| TIMM23  |        |  |  |         |          |
| TMEM189 |        |  |  |         |          |
| TMEM30B |        |  |  |         |          |
| TPBG    |        |  |  |         |          |
| TPD52L2 |        |  |  |         |          |
| TPI1    |        |  |  |         |          |
| TUBB2   |        |  |  |         |          |
| VAPB    |        |  |  |         |          |
| VEGF    |        |  |  |         |          |
| VEZT    |        |  |  |         |          |
| XPO5    |        |  |  |         |          |

**Supplementary Table S3.** Patient characteristics Pramana cohort:  
91 HNSCC stage III-IV chemoradiotherapy patients.

| Variable                   | No of patients | %  |
|----------------------------|----------------|----|
| <b>Age (years)</b>         |                |    |
| Mean                       | 58             |    |
| Range                      | 29-79          |    |
| <b>Sex</b>                 |                |    |
| Male                       | 61             | 67 |
| Female                     | 30             | 33 |
| <b>Tumor site</b>          |                |    |
| Hypopharynx                | 20             | 22 |
| Larynx                     | 7              | 8  |
| Oral cavity                | 13             | 14 |
| Oropharynx                 | 51             | 56 |
| <b>T-stage</b>             |                |    |
| 1                          | 1              | 1  |
| 2                          | 5              | 5  |
| 3                          | 32             | 35 |
| 4                          | 53             | 58 |
| <b>N-stage</b>             |                |    |
| 0                          | 24             | 26 |
| 1                          | 10             | 11 |
| 2                          | 50             | 55 |
| 3                          | 7              | 8  |
| <b>Local recurrences</b>   |                |    |
| No                         | 72             | 79 |
| Yes                        | 19             | 21 |
| <b>Median time (years)</b> |                |    |
| To local recurrence        | 0.5            |    |
| Follow-up without          | 4.3            |    |

**Supplementary Table S4.** Patient characteristics de Jong 1 cohort:  
99 larynx/oropharynx radiotherapy patients.

| Variable    |            | No of patients | %  |
|-------------|------------|----------------|----|
| Age (years) | Mean       | 62.1           |    |
|             | Range      | 42.3-85.5      |    |
| Sex         | Male       | 84             | 85 |
|             | Female     | 15             | 15 |
| Tumor site  | Larynx     | 86             | 87 |
|             | Oropharynx | 13             | 13 |
| T-stage     | 1          | 22             | 22 |
|             | 2          | 40             | 40 |
|             | 3          | 35             | 35 |
|             | 4          | 2              | 2  |
| N-stage     | 0          | 83             | 84 |
|             | 1          | 8              | 8  |
|             | 2          | 6              | 6  |
|             | 3          | 2              | 2  |

**Supplementary Table S5.** Patient characteristics de Jong 2 cohort:  
34 larynx radiotherapy patients.

| Variable           | No of patients | %   |
|--------------------|----------------|-----|
| <b>Age (years)</b> |                |     |
| Mean               | 67.2           |     |
| Range              | 40.0-85.0      |     |
| <b>Sex</b>         |                |     |
| Male               | 20             | 59  |
| Female             | 14             | 41  |
| <b>Tumor site</b>  |                |     |
| Larynx             | 34             | 100 |
| <b>T-stage</b>     |                |     |
| 2                  | 22             | 65  |
| 3                  | 12             | 35  |
| <b>N-stage</b>     |                |     |
| 0                  | 26             | 76  |
| 1                  | 1              | 3   |
| 2                  | 7              | 21  |

**Supplementary Table S6.** Patient characteristics of the van der Heijden cohort (NKI-CRAD and DESIGN combined): 174 advanced stage HPV negative HNSCC patients treated with chemoradiotherapy. Age at diagnosis and follow-up time in years.

| Variable                         |                          | No of patients | %  |
|----------------------------------|--------------------------|----------------|----|
| Age (years)                      | Median                   | 61             |    |
|                                  | Range                    | 40-80,2        |    |
| Sex                              | Male                     | 127            | 73 |
|                                  | Female                   | 47             | 27 |
| Tumor site                       | Larynx                   | 31             | 18 |
|                                  | Hypopharynx              | 66             | 38 |
|                                  | Oropharynx               | 77             | 44 |
| Stage                            | I-III                    | 35             | 20 |
|                                  | IVA-IVB                  | 139            | 80 |
| T-stage                          | T1-3                     | 110            | 63 |
|                                  | T4                       | 64             | 37 |
| N-stage                          | N0-N2a                   | 62             | 3  |
|                                  | N2b-N3                   | 112            | 64 |
| Tumor Volume<br>in cc. (N=149)   | Median                   | 23,6           |    |
|                                  | Range                    | 2,3-750        |    |
| Total cisplatin<br>dose < 200    | Yes                      | 63             | 37 |
|                                  | No                       | 107            | 63 |
| Local Recurrences                | No                       | 146            | 84 |
|                                  | Yes                      | 28             | 16 |
| Follow up time<br>(median years) | To local recurrence      | 0.71           |    |
|                                  | Without local recurrence | 4.00           |    |

**Supplementary Table S7.** Univariate Cox proportional hazard analysis of parameters with patient outcome in the Van der Heijden cohort. OS: Overall Survival; PFS: Progression Free Survival; LC: Local Control; LRC: Locoregional Control; DM: Distant Metastasis Free Survival; HR: Hazard Ratio.

| Variable                   | OS          |         |                 | PFS |         |                 | LC |         |               | LRC |         |              | DM |         |              |
|----------------------------|-------------|---------|-----------------|-----|---------|-----------------|----|---------|---------------|-----|---------|--------------|----|---------|--------------|
|                            | HR          | p-value |                 | HR  | p-value |                 | HR | p-value |               | HR  | p-value |              | HR | p-value |              |
| Gender                     |             |         |                 |     |         |                 |    |         |               |     |         |              |    |         |              |
|                            | Female      | 0,7     | 0,12            |     | 0,72    | 0,14            |    | 0,41    | 0,1           |     | 0,4     | <b>0,037</b> |    | 0,3     | <b>0,025</b> |
|                            | Male        | REF     |                 |     | REF     |                 |    | REF     |               |     | REF     |              |    | REF     |              |
| Age at diagnosis           |             | 1,01    | 0,575           |     | 1       | 0,75            |    | 1,01    | 0,836         |     | 0,99    | 0,6          |    | 0,98    | 0,46         |
| Tumor site                 |             |         |                 |     |         |                 |    |         |               |     |         |              |    |         |              |
|                            | Oropharynx  | REF     |                 |     | REF     |                 |    | REF     |               |     | REF     |              |    | REF     |              |
|                            | Hypopharynx | 0,54    | <b>0,005</b>    |     | 0,56    | <b>0,007</b>    |    | 0,77    | 0,56          |     | 0,83    | 0,61         |    | 0,44    | <b>0,04</b>  |
|                            | Larynx      | 0,57    | 0,07            |     | 0,8     | 0,43            |    | 1,6     | 0,31          |     | 1,7     | 0,18         |    | 0,94    | 0,87         |
| Disease stage              |             |         |                 |     |         |                 |    |         |               |     |         |              |    |         |              |
|                            | II-III      | 0,56    | <b>0,033</b>    |     | 0,51    | <b>0,014</b>    |    | 0,7     | 0,48          |     | 0,54    | 0,17         |    | 0,29    | <b>0,04</b>  |
|                            | IVA-IVB     | REF     |                 |     | REF     |                 |    | REF     |               |     | REF     |              |    | REF     |              |
| T classification           |             |         |                 |     |         |                 |    |         |               |     |         |              |    |         |              |
|                            | T1-T3       | REF     |                 |     | REF     |                 |    | REF     |               |     | REF     |              |    | REF     |              |
|                            | T4          | 1,18    | 0,4             |     | 1,25    | 0,26            |    | 1,22    | 0,609         |     | 0,82    | 0,55         |    | 1,03    | 0,94         |
| N classification           |             |         |                 |     |         |                 |    |         |               |     |         |              |    |         |              |
|                            | N0-N2a      | 0,81    | 0,3             |     | 0,86    | 0,44            |    | 0,91    | 0,81          |     | 1,03    | 0,92         |    | 0,46    | <b>0,049</b> |
|                            | N2b-N3      | REF     |                 |     | REF     |                 |    | REF     |               |     | REF     |              |    | REF     |              |
| Cumulative cisplatin < 200 |             |         |                 |     |         |                 |    |         |               |     |         |              |    |         |              |
|                            | No          | REF     |                 |     | REF     |                 |    | REF     |               |     | REF     |              |    | REF     |              |
|                            | Yes         | 1,84    | <b>0,003</b>    |     | 1,77    | <b>0,004</b>    |    | 5,2     | <b>0,0001</b> |     | 2,74    | <b>0,002</b> |    | 1,2     | 0,58         |
| Tumor Volume               |             | 1,006   | <b>5,81E-07</b> |     | 1,006   | <b>8,03E-06</b> |    | 1,006   | 0,26          |     | 1,005   | 0,26         |    | 1,009   | <b>0,022</b> |
| Acute Hypoxia              |             | 2,36    | <b>0,029</b>    |     | 2,66    | <b>0,009</b>    |    | 6,07    | <b>0,008</b>  |     | 5,51    | <b>0,003</b> |    | 3,7     | <b>0,035</b> |
| Chronic Hypoxia            |             | 1,37    | 0,17            |     | 1,48    | 0,07            |    | 1,96    | 0,121         |     | 2,21    | <b>0,027</b> |    | 1,31    | 0,47         |



**Supplementary Table S8.** 10 hypoxia ‘seed genes’ and correlation with in vitro Seigneuric acute and Seigneuric chronic hypoxia profiles

| Correlation with <i>in vitro</i> : | 10 seed genes |        |       |      |       |        |       |       |       |       | Average correlation |
|------------------------------------|---------------|--------|-------|------|-------|--------|-------|-------|-------|-------|---------------------|
|                                    | ADM           | SLC2A1 | PDK1  | ENO1 | HK2   | PFKFB3 | AK3   | CCNG2 | CA9   | VEGF  |                     |
| Seigneuric Acute                   | -0.22         | -0.17  | -0.05 | 0.03 | -0.18 | -0.15  | 0.05  | 0.13  | -0.05 | -0.04 | -0.06               |
| Seigneuric Chronic                 | 0.48          | 0.45   | 0.23  | 0.48 | 0.36  | 0.17   | -0.27 | 0.06  | 0.24  | 0.32  | 0.25                |
